# Supplementary material for: Allocating resources to support universal health coverage: development of a geographical funding formula in Malawi
Source: PubMed Central journal article supplement (PMC7493092; doi:10.1136/bmjgh-2020-002763), 2020-09-15
Supplement: bmjgh-2020-002763supp001.pdf [file bmjgh-2020-002763supp001.pdf]

## Supplementary Files

### Suppl. Appendix 1: The Malawian Essential Health Package & basis for service cost calculations

The definition of a standard health benefits package, delivered free at the point of access, was first developed in 2004 in the Programme of Work (2004-2010). The package was revised in 2010 and delivered under the Health Sector Strategic Plan (2010-2016) with the current EHP being defined in 2017 for delivery under the Health Sector Strategic Plan II (2017-2022).

The objective of the EHP is stated as “to ensure timely universal free access to a quality Essential Health Package, irrespective of ability-to-pay, to all the people in Malawi.” (HSSP II, 2017-2022). The HSSPII explicitly acknowledges that the cost of fully providing the EHP exceeds the resources available for its provision. A number of related issues are outlined which could impact EHP provision including; lack of awareness of the EHP among stakeholders, lack of EHP policy enforcement, inequalities in utilisation and not linking health system inputs to the EHP.

Table S1 below outlines the interventions included in the EHP and the level at which they are provided in addition to the calculation for the service costs for each individual intervention. The calculations were made according to the target populations for each district.

**Table S1: Malawi’s EHP as defined in the HSSP II**

| Category | Intervention Package | Intervention                                               | Level of Care               | Target population | Population in Need (PIN) | Coverage | Unit cost (US\$ 2016) |
|----------|----------------------|------------------------------------------------------------|-----------------------------|-------------------|--------------------------|----------|-----------------------|
| RMNCH    | ANC Package          | Tetanus toxoid (pregnant women)                            | Community/Primary/Secondary | Pregnant women    | 1.00                     | 0.93     | 0.06                  |
|          |                      | Deworming (pregnant women)                                 | Community/Primary/Secondary | Pregnant women    | 0.29                     | 1.00     | 0.05                  |
|          |                      | Daily iron and folic acid supplementation (pregnant women) | Community/Primary/Secondary | Pregnant women    | 0.31                     | 0.79     | 0.67                  |
|          |                      | Syphilis detection and treatment (pregnant women)          | Community/Primary/Secondary | Pregnant women    | 1.00                     | 1.00     | 0.46                  |
|          |                      | IPV (pregnant women)                                       | Community/Primary/Secondary | Pregnant women    | 1.00                     | 0.47     | 0.18                  |
|          |                      | ITN distribution to pregnant women                         | Community/Primary/Secondary | Pregnant women    | 1.00                     | 0.63     | 0.31                  |
|          |                      | Urinalysis (4 per pregnant woman)                          | Primary/Secondary           | Pregnant women    | 1.00                     | 0.55     | 6.26                  |
|          |                      | Injectable                                                 | Community/Primary/Secondary |                   |                          |          | 0.50                  |

| Category | Intervention Package   | Intervention                                                                      | Level of Care               | Target population       | Population in Need (PIN) | Coverage | Unit cost (US\$ 2016) |
|----------|------------------------|-----------------------------------------------------------------------------------|-----------------------------|-------------------------|--------------------------|----------|-----------------------|
|          | Modern Family Planning | IUD                                                                               | Primary/Secondary           |                         |                          |          | 0.16                  |
|          |                        | Implant                                                                           | Primary/Secondary           |                         |                          |          | 1.10                  |
|          |                        | Pill                                                                              | Community/Primary/Secondary |                         |                          |          | 1.05                  |
|          |                        | Female sterilization                                                              | Secondary                   |                         |                          |          | 19.53                 |
|          |                        | Male condom                                                                       | Community/Primary/Secondary | Male adults 15-49 years | 1.00                     | 0.53     | 3.04                  |
|          | Delivery Package       | Clean practices and immediate essential new-born care (in facility)               | Primary/Secondary           | Births                  | 1.00                     | -        | 1.35                  |
|          |                        | Active management of the 3rd stage of labour                                      | Primary/Secondary           | Pregnant women          | 1.00                     | 0.67     | 0.06                  |
|          |                        | Management of eclampsia (Magnesium sulphate, Methyldopa, Nifedipine, Hydralazine) | Primary/Secondary           | Pregnant women          | 0.018                    | 0.873    | 4.77                  |
|          |                        | Management of pre-eclampsia                                                       | Primary/Secondary           | Pregnant women          | 0.0218                   | 0.8733   | 4.77                  |
|          |                        | Neonatal resuscitation (institutional)                                            | Primary/Secondary           | Births                  | 0.01                     | 1.00     | 8.13                  |
|          |                        | Caesarean section with indication                                                 | Secondary                   | Pregnant women          | 0.005                    | 0.897    | 21.05                 |
|          |                        | Caesarean section with indication (with complication)                             | Secondary                   | Pregnant women          | 0.0009                   | 0.8972   | 49.44                 |
|          |                        | Vaginal delivery, skilled attendance                                              | Primary/Secondary           | Pregnant women          | 0.8449                   | 0.8972   | 4.28                  |
|          |                        | Vaginal delivery, skilled attendance (with complications)                         | Primary/Secondary           | Pregnant women          |                          |          | 3.69                  |
|          |                        | Management of obstructed labour                                                   | Primary/Secondary           | Pregnant women          | 0.10                     | 1.00     | 30.21                 |
|          |                        | Newborn sepsis - full supportive care                                             | Primary/Secondary           | Births                  | 0.12                     | 0.87     | 9.70                  |
|          |                        | Newborn sepsis – injectable antibiotics                                           | Primary/Secondary           | Births                  | 0.09                     | 0.87     | 0.73                  |
|          |                        | Antenatal corticosteroids for preterm labour                                      | Primary/Secondary           | Pregnant women          | 0.18                     | 0.50     | 6.39                  |
|          |                        | Maternal sepsis case management                                                   | Primary/Secondary           | Pregnant women          | 0.07                     | 0.82     | 51.25                 |
|          |                        | Cord Care Using Chlorhexidine                                                     | Primary/Secondary           | Births                  | 1.00                     | 0.76     | 0.07                  |

| Category                     | Intervention Package                       | Intervention                        | Level of Care               | Target population                                            | Population in Need (PIN) | Coverage | Unit cost (US\$ 2016) |
|------------------------------|--------------------------------------------|-------------------------------------|-----------------------------|--------------------------------------------------------------|--------------------------|----------|-----------------------|
|                              |                                            | Hysterectomy                        | Primary/Secondary           |                                                              |                          |          |                       |
|                              |                                            | Post-abortion case management       | Secondary                   |                                                              |                          |          | 12.34                 |
|                              |                                            | Treatment of antepartum haemorrhage | Primary/Secondary           | Pregnant women                                               |                          |          |                       |
|                              |                                            | Treatment of postpartum haemorrhage | Secondary                   | Pregnant women                                               | 0.039                    | 0.640    | 16.96                 |
|                              |                                            | Antibiotics for pPRoM               | Primary/Secondary           | Pregnant women                                               | 0.07                     | 0.81     | 7.74                  |
| Vaccine Preventable diseases | Essential Vaccines Package                 | Rotavirus vaccine                   | Community/Primary/Secondary | Children < 1                                                 | 1.00                     | 0.94     | 2.19                  |
|                              |                                            | Measles Rubella vaccine             | Community/Primary/Secondary | Children < 1                                                 | 1.00                     | 0.95     | 0.65                  |
|                              |                                            | Pneumococcal vaccine                | Community/Primary/Secondary | Children < 1                                                 | 1.00                     | 0.92     | 2.97                  |
|                              |                                            | BCG vaccine                         | Community/Primary/Secondary | Children < 1                                                 | 1.00                     | 0.98     | 0.19                  |
|                              |                                            | Polio vaccine                       | Community/Primary/Secondary | Children < 1                                                 | 1.00                     | 0.87     | 0.11                  |
|                              |                                            | DPT-Heb-Hib / Pentavalent vaccine   | Community/Primary/Secondary | Children < 1                                                 | 1.00                     | 0.95     | 1.83                  |
|                              |                                            | HPV vaccine                         | Community/Primary/Secondary | Females 9-13 years                                           | 2                        | 0.67     | 0.71                  |
| Malaria                      | First Line uncomplicated Malaria treatment | Uncomplicated (adult, <36 kg)       | Community/Primary/Secondary | Population >15 who suffered fever or malaria in past 2 weeks | 1.0                      | 0.33     | 1.75                  |
|                              |                                            | Uncomplicated (adult, >36 kg)       | Community/Primary/Secondary | Population >15 who suffered fever or malaria in past 2 weeks | 1.00                     | 0.67     | 2.00                  |
|                              |                                            | Uncomplicated (children, <15 kg)    | Community/Primary/Secondary | Population 0-4 who suffered fever or malaria in past 2 weeks | 1.00                     | 0.59     | 22.41                 |
|                              |                                            | Uncomplicated (children, >15 kg)    | Community/Primary/Secondary | Population 0-4 who suffered fever or malaria in past 2 weeks | 1.00                     | 0.41     | 23.24                 |

| Category                                            | Intervention Package          | Intervention                                                        | Level of Care               | Target population                                            | Population in Need (PIN) | Coverage | Unit cost (US\$ 2016) |
|-----------------------------------------------------|-------------------------------|---------------------------------------------------------------------|-----------------------------|--------------------------------------------------------------|--------------------------|----------|-----------------------|
|                                                     | Complicated Malaria treatment | Complicated (adults, injectable artesunate)                         | Primary/Secondary           | Population >15 who suffered fever or malaria in past 2 weeks | 1.00                     | 1.00     | 2.79                  |
|                                                     |                               | Complicated (children, injectable artesunate)                       | Primary/Secondary           | Population 0-4 who suffered fever or malaria in past 2 weeks | 1.00                     | 1.00     | 1.33                  |
|                                                     | Malaria Diagnosis             | RDTs                                                                | Community/Primary/Secondary |                                                              |                          |          |                       |
|                                                     |                               | Microscopy for Malaria                                              | Primary/Secondary           |                                                              |                          |          |                       |
| Integrated management of childhood illnesses (IMCI) | ARIs                          | Pneumonia treatment (children)                                      | Community/Primary/Secondary | Children months 1-59                                         | 0.03                     | 0.77     | 0.41                  |
|                                                     |                               | Treatment of severe pneumonia (Oxygen)                              | Primary/Secondary           | Children months 1-59                                         | 0.0007                   | 0.7713   | 5.54                  |
|                                                     | Diarrhoeal Disease            | ORS                                                                 | Community/Primary/Secondary | Children months 0-59                                         | 2.22                     | 0.70     | 0.05                  |
|                                                     |                               | Zinc                                                                | Community/Primary/Secondary | Children months 1-59                                         | 2.22                     | 0.46     | 0.18                  |
|                                                     |                               | Treatment of severe diarrhoea (IV Fluids)                           | Primary/Secondary           | Children months 1-59                                         | 0.02                     | 1.00     | 0.45                  |
|                                                     | Nutrition                     | Community management of nutrition in under-5 - Plumpy Peanut        | Community/Primary           |                                                              |                          |          |                       |
|                                                     |                               | Community management of nutrition in under-5 - micronutrient powder | Community/Primary           |                                                              |                          |          |                       |
|                                                     |                               | Community management of nutrition in under-5 - vitamin A            | Community/Primary           |                                                              |                          |          |                       |
|                                                     | Malaria Diagnosis             | RDTs for under-5                                                    | Community/Primary           |                                                              |                          |          |                       |
|                                                     | Community Health              | Community Health Package                                            | Growth Monitoring           | Community/Primary                                            |                          |          |                       |
| Vermin and Vector Control & Promotion               |                               |                                                                     | Community/Primary           |                                                              |                          |          | 0                     |
| Disease Surveillance                                |                               |                                                                     | Community/Primary           |                                                              |                          |          | 0                     |
| Community Health Promotion & Engagement             |                               |                                                                     | Community/Primary           |                                                              |                          |          | 0                     |
| Village Inspections                                 |                               |                                                                     | Community/Primary           |                                                              |                          |          | 0                     |

| Category  | Intervention Package | Intervention                                                                                                             | Level of Care                                 | Target population                                    | Population in Need (PIN) | Coverage | Unit cost (US\$ 2016) |
|-----------|----------------------|--------------------------------------------------------------------------------------------------------------------------|-----------------------------------------------|------------------------------------------------------|--------------------------|----------|-----------------------|
|           |                      | Promotion of hygiene (hand washing with soap)                                                                            | Community/Primary                             |                                                      |                          |          | 0                     |
|           |                      | Promotion of Sanitation (latrine refuse, drop hole covers, solid waste disposal, hygienic disposal of children's stools) | Community/Primary                             |                                                      |                          |          | 0                     |
|           |                      | Occupational Health Promotion                                                                                            | Community/Primary                             |                                                      |                          |          | 0                     |
|           |                      | Household water quality testing and treatment                                                                            | Community/Primary                             |                                                      |                          |          | 0                     |
|           |                      | Home-based care of chronically ill patients                                                                              | Community/Primary                             |                                                      |                          |          | 0                     |
|           |                      | Child Protection                                                                                                         | Community/Primary                             |                                                      |                          |          | 0                     |
| NTDs      | Treatment and MDA    | Schistosomiasis mass drug administration                                                                                 | Community/Primary                             |                                                      |                          |          | 0.01                  |
|           |                      | Case finding and treatment of Trypanosomiasis                                                                            | Primary                                       |                                                      |                          |          |                       |
|           |                      | Trachoma mass drug administration                                                                                        | Community/Primary                             |                                                      |                          |          | 0.53                  |
| HIV/AIDS  | HIV Prevention       | Cotrimoxazole for children                                                                                               | Community/Primary/Secondary                   |                                                      |                          |          | 5.15                  |
|           |                      | PMTCT                                                                                                                    | Community/Primary/Secondary                   | Pregnant women with HIV/AIDS                         | 1.00                     | 0.85     | 11.35                 |
|           | HIV Testing          | HIV Testing Services (HTS)                                                                                               | Community/Primary/Secondary                   |                                                      |                          |          | 4.73                  |
|           |                      | HIV Treatment                                                                                                            | HIV Treatment for all ages – ART & Viral Load | Community/Primary/Secondary                          | HIV prevalence           | 1.00     | 1.00                  |
| Nutrition |                      | Vitamin A supplementation in pregnant women                                                                              | Community/Primary/Secondary                   | Pregnant women                                       | 0.14                     | 0.67     | 2.31                  |
|           |                      | Management of severe malnutrition (children)                                                                             | Community/Primary/Secondary                   | Number of children <5 -3 SD below weight-for-age     | 1.00                     | 0.7333   | 89.16                 |
|           |                      | Deworming (children)                                                                                                     | Community/Primary/Secondary                   | Children 0-14 years                                  | 1.00                     | 0.72     | 0.17                  |
|           |                      | Vitamin A supplementation in infants and children 6-59 months                                                            |                                               | Number of children <5 months not fed minimum dietary |                          |          |                       |

| Category | Intervention Package    | Intervention                                                         | Level of Care                                     | Target population                                             | Population in Need (PIN)                                | Coverage | Unit cost (US\$ 2016) |       |
|----------|-------------------------|----------------------------------------------------------------------|---------------------------------------------------|---------------------------------------------------------------|---------------------------------------------------------|----------|-----------------------|-------|
|          |                         |                                                                      | Community/Primary/Secondary                       | diversity (assuming same proportions as children 6-23 months) | 1.00                                                    | 0.89     | 0.09                  |       |
| TB       |                         | Isonized Preventive Therapy for children in contact with TB patients | Primary/Secondary                                 |                                                               |                                                         |          | 3.29                  |       |
|          |                         | First line treatment for new TB Cases for adults                     | Primary/Secondary                                 | Total population >15                                          | 0.00227                                                 | 0.79     | 20.02                 |       |
|          |                         | First line treatment for retreatment TB Cases for adults             | Primary/Secondary                                 | Total population >15                                          | 0.00227                                                 | 0.12     | 86.15                 |       |
|          |                         | First line treatment for new TB Cases for children                   | Community/Primary/Secondary                       | Total population <15                                          | 0.00227                                                 | 0.09     | 33.88                 |       |
|          |                         | First line treatment for retreatment TB Cases for children           | Community/Primary/Secondary                       | Total population <15                                          | 0.00227                                                 | 0.005    | 75.32                 |       |
|          |                         | Case management of MDR cases                                         | Primary/Secondary                                 |                                                               |                                                         |          | 858.82                |       |
|          | TB Testing              |                                                                      | LED test                                          | Primary/Secondary                                             |                                                         |          |                       | 0.24  |
|          |                         |                                                                      | Xpert test                                        | Primary/Secondary                                             |                                                         |          |                       | 9.83  |
|          |                         |                                                                      | MGIT test                                         | Primary/Secondary                                             |                                                         |          |                       | 31.75 |
|          |                         |                                                                      | LJ test                                           | Primary/Secondary                                             |                                                         |          |                       | 0.21  |
| NCDs     |                         | Treatment of Injuries (Fracture & dislocation)                       | Primary/Secondary                                 | Total population                                              | 0.0008                                                  | 1.00     | 51.63                 |       |
|          |                         | Treatment of Injuries (Blunt trauma / soft tissue injuries)          | Primary/Secondary                                 | Total population                                              | 0.0004                                                  | 1.00     | 9.74                  |       |
|          | Mental Health treatment |                                                                      | Basic psychosocial support, advice, and follow-up | Community/Primary/Secondary                                   |                                                         |          |                       |       |
|          |                         |                                                                      | Anti-epileptic medication                         | Community/Primary/Secondary                                   | Population with epilepsy                                | 1.00     | 0.05                  | 6.96  |
|          |                         |                                                                      | Treatment of depression (first line)              | Community/Primary/Secondary                                   | Of those chronically ill proportion with mental illness | 1.00     | 0.02                  | 27.15 |
|          |                         | Testing of pre-cancerous cells (vinegar)                             | Primary/Secondary                                 |                                                               |                                                         |          |                       |       |

| Category    | Intervention Package | Intervention                                      | Level of Care     | Target population | Population in Need (PIN) | Coverage | Unit cost (US\$ 2016) |
|-------------|----------------------|---------------------------------------------------|-------------------|-------------------|--------------------------|----------|-----------------------|
|             | Diabetes treatment   | Diabetes Type I                                   | Primary/Secondary | Adults 40+        | 0.009                    | 0.283    | 247.78                |
|             |                      | Diabetes Type II                                  | Primary/Secondary | Adults 40+        | 0.056                    | 0.283    | 102.56                |
|             |                      | Hypertension                                      | Primary/Secondary | Adults 40+        | 0.329                    | 0.25     | 8.56                  |
| Oral Health | Tooth pain treatment | Management of severe tooth pain, tooth extraction | Primary/Secondary | People 4+         | 0.04                     | 1.00     | 0.30                  |
|             |                      | Management of mild tooth pain, tooth filling      | Primary/Secondary | People 4+         | 0.02                     | 1.00     | 2.49                  |

Data on patient populations comes from a mid-term re-costing of the Health Sector Strategic Plan (2011-2016) undertaken by Clinton Health Access Initiative (CHAI) in 2014. For each intervention the target population (e.g. pregnant women, women in need of PMTCT, etc.) was identified. The cost of each intervention was calculated using a bottom-up ingredients based approach but only reflects drug and supply inputs rather than a cost per patient treated.

Suppl. Appendix Table S2: Selected target population calculations

| Target population                                                  | Data source & calculation                                                                                                                                                                                                                                                                                                                                                                                                                                                                                                                                             | Assumptions                                                                                                                                                                                                                                                                                                                                                                      |
|--------------------------------------------------------------------|-----------------------------------------------------------------------------------------------------------------------------------------------------------------------------------------------------------------------------------------------------------------------------------------------------------------------------------------------------------------------------------------------------------------------------------------------------------------------------------------------------------------------------------------------------------------------|----------------------------------------------------------------------------------------------------------------------------------------------------------------------------------------------------------------------------------------------------------------------------------------------------------------------------------------------------------------------------------|
| Pregnant women                                                     | Data: <ul style="list-style-type: none"> <li>- Females 15-49 years (Population &amp; Housing Census, 2008)</li> <li>- % women aged 15-49 pregnant (Demographic &amp; Household Survey, 2015/16)</li> </ul> Calculation: $\text{Females 15 – 49 years} \times \left( \frac{\% \text{ women aged 15 – 49 currently pregnant}}{100} \right)$                                                                                                                                                                                                                             | <ul style="list-style-type: none"> <li>- No women outside the age range 15-49 are pregnant or the proportion of women pregnant outside this age range is proportional across districts.</li> <li>- Data was not available on the percentage of women pregnant in Blantyre, Lilongwe, Mzuzu and Zomba city. The percentage from their corresponding district was used.</li> </ul> |
| Births                                                             | Data: <ul style="list-style-type: none"> <li>- Live births (2016) (District Health Information System 2)</li> </ul> Calculation:<br>N/A                                                                                                                                                                                                                                                                                                                                                                                                                               |                                                                                                                                                                                                                                                                                                                                                                                  |
| Population >15 years who suffered fever or malaria in past 2 weeks | Data: <ul style="list-style-type: none"> <li>- Proportion who suffered incidence of sickness in past 2 weeks (Integrated Household Survey 4, 2016/17)</li> <li>- Of those who suffered sickness proportion who suffered malaria or fever (Integrated Household Survey 4, 2016/17)</li> <li>- Population &gt;15 (Population &amp; Housing Census, 2008)</li> </ul> Calculation: $\left( \frac{\% \text{ suffering sickness}}{100} \right) \times \left( \frac{\text{Of those \% suffering malaria or fever}}{100} \right) \times \text{population} > 15 \text{ years}$ | <ul style="list-style-type: none"> <li>- Assumption that the 2 week period in which the survey was taken does not suffer any systematic differences with the rest of the year which effect the geographical distribution of malaria.</li> </ul>                                                                                                                                  |
| Population 0-4 years who suffered fever or malaria in past 2 weeks | Data: <ul style="list-style-type: none"> <li>- Proportion who suffered incidence of sickness in past 2 weeks (Integrated Household Survey 4, 2016/17)</li> <li>- Of those who suffered sickness proportion who suffered malaria or fever (Integrated Household Survey 4, 2016/17)</li> <li>- Population 0-4 years (Population &amp; Housing Census, 2008)</li> </ul> Calculation:                                                                                                                                                                                     | <ul style="list-style-type: none"> <li>- Assumption that the 2 week period in which the survey was taken does not suffer any systematic differences with the rest of the year which effect the geographical distribution of malaria.</li> </ul>                                                                                                                                  |



|                                                                          |                                                                                                                                                                                                                                                                                                                                                                                                                    |                                                                                                                                                                                                                                                                                                                                                                                                                                                                                                                                                                                                              |
|--------------------------------------------------------------------------|--------------------------------------------------------------------------------------------------------------------------------------------------------------------------------------------------------------------------------------------------------------------------------------------------------------------------------------------------------------------------------------------------------------------|--------------------------------------------------------------------------------------------------------------------------------------------------------------------------------------------------------------------------------------------------------------------------------------------------------------------------------------------------------------------------------------------------------------------------------------------------------------------------------------------------------------------------------------------------------------------------------------------------------------|
|                                                                          | $\left(\frac{\% \text{ suffering sickness}}{100}\right) \times \left(\frac{\text{Of those \% suffering malaria or fever}}{100}\right) \times \text{population 0 – 4 years}$                                                                                                                                                                                                                                        |                                                                                                                                                                                                                                                                                                                                                                                                                                                                                                                                                                                                              |
| Number of children <5 years - 3 standard deviations below weight-for-age | <p>Data:</p> <ul style="list-style-type: none"> <li>- Children &lt; 5 years (Population &amp; Housing Census, 2008)</li> <li>- Proportion of children &lt;5 years -3 standard deviations below weight-for-age (Demographic &amp; Household Survey, 2015/16)</li> </ul> <p>Calculation:</p> $\text{Children < 5 years} \times \left(\frac{\% \text{ children < 5 – 3 SD below weight – for – age}}{100}\right)$     | <ul style="list-style-type: none"> <li>- This target population is applied to the nutrition intervention ‘management of severe malnutrition’. In the EHP tool this intervention had a target population children 1-59 months with a population in need of 1.15%. As the average proportion of children &lt;5 -3 SD below weight-for-age across all districts is 2.5% this was deemed a usable replacement for the target population with a new assumed 100% population in need. The intention is this would capture more of the district variation in expected expenditure for this intervention.</li> </ul> |
| Number of children <5 years not fed minimum dietary diversity            | <p>Data:</p> <ul style="list-style-type: none"> <li>- Children &lt; 5 years (Population &amp; Housing Census, 2008)</li> <li>- Proportion of children aged 6-23 months fed minimum dietary diversity (Demographic &amp; Household Survey, 2015/16)</li> </ul> <p>Calculation:</p> $\text{Children < 5 years} \times \left(\frac{\% \text{ children aged 6 – 23 months fed minimum dietary diversity}}{100}\right)$ | <ul style="list-style-type: none"> <li>- Assumes the proportion of children fed minimum dietary diversity is constant for those aged 6-23 months and those aged &lt;5 years, or at least the relative proportions across districts are constant.</li> </ul>                                                                                                                                                                                                                                                                                                                                                  |
| HIV+ population                                                          | <p>Data:</p> <ul style="list-style-type: none"> <li>- Population 15-49 years (Population &amp; Housing Census, 2008)</li> <li>- HIV prevalence among population 15-49 years (Demographic &amp; Household Survey, 2015/16)</li> </ul> <p>Calculation:</p> $\text{Population 15 – 49 years} \times \left(\frac{\text{HIV prevalence (\%)} \text{ among 15 – 49 years}}{100}\right)$                                  |                                                                                                                                                                                                                                                                                                                                                                                                                                                                                                                                                                                                              |

|                                |                                                                                                                                                                                                                                                                                                                                                                                                                                                                                                                                              |                                                                                                                                                                                                                                 |
|--------------------------------|----------------------------------------------------------------------------------------------------------------------------------------------------------------------------------------------------------------------------------------------------------------------------------------------------------------------------------------------------------------------------------------------------------------------------------------------------------------------------------------------------------------------------------------------|---------------------------------------------------------------------------------------------------------------------------------------------------------------------------------------------------------------------------------|
| Pregnant women with HIV/AIDS   | <p>Data:</p> <ul style="list-style-type: none"> <li>- Females 15-49 years (Population &amp; Housing Census, 2008)</li> <li>- % women aged 15-49 pregnant (Demographic &amp; Household Survey, 2015/16)</li> <li>- HIV prevalence among population 15-49 years (Demographic &amp; Household Survey, 2015/16)</li> </ul> <p>Calculation:</p> $\left( \text{Females 15 – 49 years} \times \left( \frac{\% \text{ women aged 15 – 49 currently pregnant}}{100} \right) \right) \times$ $\times \text{ HIV prevalence (\% ) among 15 – 49 years}$ |                                                                                                                                                                                                                                 |
| Population with mental illness | <p>Data:</p> <ul style="list-style-type: none"> <li>- Proportion of population chronically illness (Integrated Household Survey, 2016/17)</li> <li>- Of those chronically ill, proportion with mental illness (Integrated Household Survey, 2016/17)</li> <li>- Population (Population &amp; Housing Census, 2008)</li> </ul> <p>Calculation:</p> $\left( \frac{\% \text{ suffering chronic illness}}{100} \right) \times \left( \frac{\text{Of those, \% suffering mental illness}}{100} \right) \times \text{population}$                  | <ul style="list-style-type: none"> <li>- As this target population is applied to treatment of depression there is an assumption that depression is distributed across districts in proportion to all mental illness.</li> </ul> |
| Population with epilepsy       | <p>Data:</p> <ul style="list-style-type: none"> <li>- Proportion of population chronically illness (Integrated Household Survey, 2016/17)</li> <li>- Of those chronically ill, proportion with epilepsy (Integrated Household Survey, 2016/17)</li> <li>- Population (Population &amp; Housing Census, 2008)</li> </ul> <p>Calculation:</p> $\left( \frac{\% \text{ suffering chronic illness}}{100} \right) \times \left( \frac{\text{Of those, \% suffering epilepsy}}{100} \right) \times \text{population}$                              |                                                                                                                                                                                                                                 |
